# Supplementary material
Source: HighWire-hosted journal article supplement (https://www.jrheum.org/highwire/filestream/40453/field_highwire_adjunct_files/0/201663DataSuppl.pdf)
Supplement: 201663DataSuppl.pdf [file 201663DataSuppl.pdf]

**Supplementary Figure 1: Summary of clinical manifestations of patients with Majeed syndrome as described in literature. New features seen in the Indian cohort of patients are shown in bold font.**

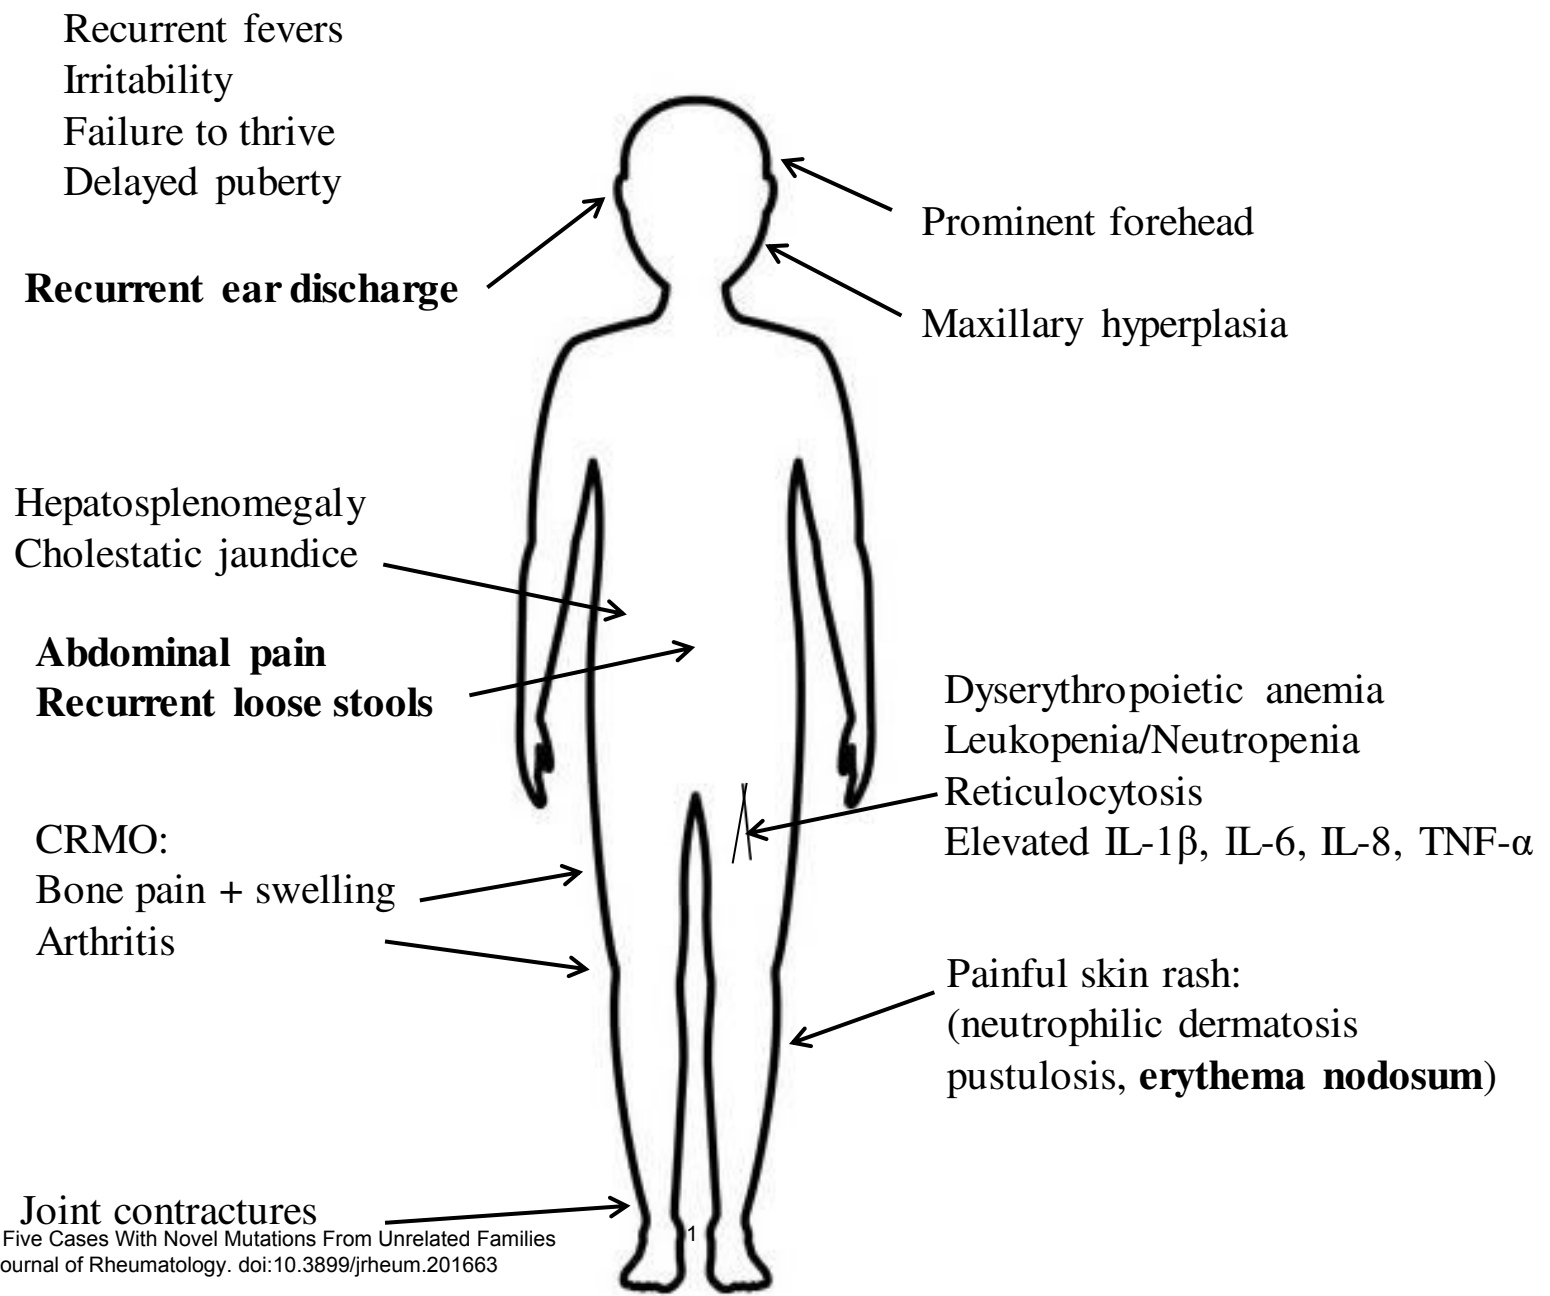

Supplementary Table 1: Radiological features and treatment of our patient cohort with Majeed syndrome:

| Patient number                | 1                                                                                                                                                                                                                                                | 2                                                                                                                                                                                 | 3                                                                                      | 4                                                                                                                | 5                                                                                                                                                                                                                                                   |
|-------------------------------|--------------------------------------------------------------------------------------------------------------------------------------------------------------------------------------------------------------------------------------------------|-----------------------------------------------------------------------------------------------------------------------------------------------------------------------------------|----------------------------------------------------------------------------------------|------------------------------------------------------------------------------------------------------------------|-----------------------------------------------------------------------------------------------------------------------------------------------------------------------------------------------------------------------------------------------------|
| <b>Radiological findings:</b> |                                                                                                                                                                                                                                                  |                                                                                                                                                                                   |                                                                                        |                                                                                                                  |                                                                                                                                                                                                                                                     |
| <b>Skeletal survey</b>        | Subtle, smooth periosteal reaction along the left proximal tibial metadiaphysis                                                                                                                                                                  | Generalized reduced bone density, ankylosis b/l elbows, osteophytes left elbow, flexion deformity right elbow. Subchondral sclerosis along the proximal articular surface of ulna | Not done                                                                               | Not done                                                                                                         | Not done                                                                                                                                                                                                                                            |
| <b>Bone scan</b>              | Mild diffuse early and late-stage uptake in the entire left lower extremity with more focal uptake along the proximal tibia corresponding to the radiographic abnormality and mild areas of increased uptake in the tenth and eleventh vertebral | Normal                                                                                                                                                                            | Increased uptake on early and late phase images around the right wrist, knee and ankle | Increased uptake in proximal and distal epiphysis left tibia with possible extension in the shaft on both phases | Increased blood flow around right ankle and delayed increased uptake along the distal right femur and left tibia<br><br>A follow up bone scan with SPECT after seven years - increased early and late phase uptake around the right wrist and ankle |
| <b>MRI</b>                    | *Marrow and periosteal edema along the left distal                                                                                                                                                                                               | Not done                                                                                                                                                                          | Right proximal humeral, radial head, distal radial                                     | <u>MRI left lower extremity</u> : small left hip joint effusion,                                                 | Moderate left talonavicular effusion with mild                                                                                                                                                                                                      |

|  |                                                                                                                                                                                                                                                                                                             |  |                                                                                                                                                                                                                                                                                                                                                                                                                                                                                         |                                                                                                                                                                                                                                                                                                                                                                                                                                                                                                           |                                                                                                                                                                                  |
|--|-------------------------------------------------------------------------------------------------------------------------------------------------------------------------------------------------------------------------------------------------------------------------------------------------------------|--|-----------------------------------------------------------------------------------------------------------------------------------------------------------------------------------------------------------------------------------------------------------------------------------------------------------------------------------------------------------------------------------------------------------------------------------------------------------------------------------------|-----------------------------------------------------------------------------------------------------------------------------------------------------------------------------------------------------------------------------------------------------------------------------------------------------------------------------------------------------------------------------------------------------------------------------------------------------------------------------------------------------------|----------------------------------------------------------------------------------------------------------------------------------------------------------------------------------|
|  | <p>femoral metadiaphysis and bone marrow edema in the left talus and navicular. Subtle asymmetrical marrow edema at proximal metaphysis left tibia. Spine and other bones were normal. The long bones showed multiple transverse metaphyseal lines (“zebra lines”), likely due to pamidronate treatment</p> |  | <p>metaphyseal, carpal, left distal radial metaphyseal, third metacarpal, right more than left distal femoral, left more than right proximal tibial bone marrow edema with subtle periosteal edema and fluid along the lower extremity and left third metacarpal regions. The lesions were transphyseal with extension of bone marrow edema in the epiphyseal regions in addition to metadiaphysis in bilateral proximal tibia and mild to moderate bilateral elbow joint effusions</p> | <p>mild left femoral neck edema and left proximal medial tibial metaphyseal bone marrow edema.</p> <p><u>Repeat b/l lower extremity screening</u></p> <p><u>MRI</u>: Distal femoral metaphyseal bone marrow edema with periostitis and bilateral left more than right proximal tibial bone edema.</p> <p># Resolution of the previous lesions in both lower limbs. Mild bone marrow edema in the left distal metadiaphyseal region of the radius and adjacent pronator quadratus muscle in the distal</p> | <p>to moderate edema in the left talus, navicular, cuboid, cuneiform bones, 2<sup>nd</sup> and 3<sup>rd</sup> metatarsal bases and the right 5<sup>th</sup> metatarsal shaft</p> |
|--|-------------------------------------------------------------------------------------------------------------------------------------------------------------------------------------------------------------------------------------------------------------------------------------------------------------|--|-----------------------------------------------------------------------------------------------------------------------------------------------------------------------------------------------------------------------------------------------------------------------------------------------------------------------------------------------------------------------------------------------------------------------------------------------------------------------------------------|-----------------------------------------------------------------------------------------------------------------------------------------------------------------------------------------------------------------------------------------------------------------------------------------------------------------------------------------------------------------------------------------------------------------------------------------------------------------------------------------------------------|----------------------------------------------------------------------------------------------------------------------------------------------------------------------------------|

|                   |                                                 |                                  |                                                                                       |                                                             |                                                                                                                     |
|-------------------|-------------------------------------------------|----------------------------------|---------------------------------------------------------------------------------------|-------------------------------------------------------------|---------------------------------------------------------------------------------------------------------------------|
|                   |                                                 |                                  |                                                                                       | forearm with mild edema in the medial end of both clavicles |                                                                                                                     |
| <b>Treatment:</b> |                                                 |                                  |                                                                                       |                                                             |                                                                                                                     |
| <b>Treatment</b>  | Pamidronate,<br>methotrexate, p.r.n<br>naproxen | Pamidronate, p.r.n<br>diclofenac | Oral prednisolone,<br>methotrexate,<br>azathioprine,<br>sulfasalazine,<br>Pamidronate | Pamidronate,<br>p. r. n naproxen                            | Oral prednisolone,<br>methotrexate,<br>azathioprine,<br>sulfasalazine,<br>etanercept,<br>adalimumab,<br>pamidronate |

\* = Two years into treatment; # = One year into treatment

**Abbreviations:** b/l = Bilateral; y = years; m = months

Supplementary Table 2: Novel *LPIN2* mutations identified in this cohort of patients and support for their pathogenicity based on *in silico* predictions and ACMG classification

| Patient | Genomic coordinates              | Codon change/<br>Amino acid substitution | gnomAD<br>MAF | Consequence                                                                                                         | SIFT | Mutation<br>Taster | PolyPhen | CADD | SpliceAI | ACMG<br>classification            |
|---------|----------------------------------|------------------------------------------|---------------|---------------------------------------------------------------------------------------------------------------------|------|--------------------|----------|------|----------|-----------------------------------|
| 1       | Chr18:<br>2922166G>A             | c.2206C>T;<br>p.R736C                    | 0.000003984   | Missense                                                                                                            | D    | D                  | PD       | 32   | -        | VUS (PM1,<br>PM2, PP3)            |
| 2       | Chr18:<br>2924439-<br>2924441    | c.2041delT;<br>p.W681fs                  | 0             | Frameshift                                                                                                          | -    | -                  | -        | -    | -        | Pathogenic<br>(PVS1, PM2,<br>PP3) |
| 3       | Chr18:<br>2923768_<br>2923769del | c.2174+4_<br>2174+5del                   | 0             | 5' splice site<br>intronic variant<br>affecting 4<br>nucleotides<br>downstream<br>donor splice site<br>of exon 16   | -    | -                  | -        | -    | 0.97     | VUS (PM2,<br>PP3)                 |
| 4       | Chr18:<br>2924522C>T             | c.1961G>A;<br>p.G654D                    | 0             | Missense                                                                                                            | D    | D                  | PD       | 29.9 | -        | VUS (PM1,<br>PM2, PP3)            |
| 5       | Chr18:<br>2928584C>G             | c.1620+5G>C                              | 0             | 5'splice site<br>intronic variant<br>affecting 5<br>nucleotides<br>downstream of<br>donor splice site<br>of exon 11 | -    | D                  | -        | 22.5 | 0.7      | VUS (PM2,<br>BP4)                 |

NM014646.2, All five variants are conserved across all species.

**ACMG classification criterion: Pathogenic moderate 1 (PM1)** = Located in a mutational hot spot and/or critical and well-established functional domain (e.g., active site of an enzyme) without benign variation; **Pathogenic moderate 2 (PM2)** = Absent from controls (or at extremely low frequency if recessive) in Exome Sequencing Project, 1000 Genomes or ExAC; **Pathogenic supporting 3 (PP3)** = Multiple lines of computational evidence support a deleterious effect on the gene or gene product (conservation, evolutionary, splicing impact, etc); **Pathogenic Very strong (PVS1)** = Null variant (nonsense, frameshift, canonical +/-1 or 2 splice sites, initiation codon, single or multi-exon deletion) in a gene where loss of function (LOF) is a known mechanism of disease; **Benign supporting 4 (BP4)** = Multiple lines of computational evidence suggest no impact on gene or gene product (conservation, evolutionary, splicing impact, etc)

Supplementary Table 3: Salient features of twenty-five molecularly confirmed patients with Majeed syndrome reported in literature:

| Authors/<br>number (n)                                              | Ancestry  | Consanguinity | Gender/<br>Age – onset /diagnosis | Features                                                          | Pathogenic variant                                  |
|---------------------------------------------------------------------|-----------|---------------|-----------------------------------|-------------------------------------------------------------------|-----------------------------------------------------|
| <b>Ferguson et al.</b><br><br><b>(3, 15-17)</b><br><br><b>n = 6</b> | Arabic    | +             | F/9m/NA                           | Failure to thrive                                                 | Homozygous for<br><br>c.2201C>T;<br><br>p.Ser734Leu |
|                                                                     | Sibship 1 |               |                                   | Recurrent fever                                                   |                                                     |
|                                                                     |           |               |                                   | CRMO                                                              |                                                     |
|                                                                     |           |               | M/NA/NA                           | Microcytic anemia<br><br>* Skin lesions<br><br>Hepatosplenomegaly |                                                     |
|                                                                     | Arabic    | +             | M/6m/NA                           | Failure to thrive                                                 | Homozygous for<br><br>c.2201C>T;<br><br>p.Ser734Leu |
|                                                                     | Sibship 2 |               |                                   | Recurrent fever                                                   |                                                     |
|                                                                     |           |               |                                   | CRMO                                                              |                                                     |
|                                                                     |           |               | M/10m/NA                          | Microcytic anemia<br><br>Sweet syndrome<br><br>Hepatosplenomegaly |                                                     |
|                                                                     |           | +             | * F/3w/NA                         | Failure to thrive                                                 | Homozygous for                                      |

|                                                    |                         |   |                |                                                                                                                                                                                                                                                                                                                                                                                                |                                                            |
|----------------------------------------------------|-------------------------|---|----------------|------------------------------------------------------------------------------------------------------------------------------------------------------------------------------------------------------------------------------------------------------------------------------------------------------------------------------------------------------------------------------------------------|------------------------------------------------------------|
|                                                    | Arabic<br><br>Sibship 3 |   |                | <sup>b</sup> Recurrent fever<br><br><sup>c</sup> CRMO<br><br><sup>d</sup> Microcytic anemia<br><br><sup>*</sup> Splenomegaly<br><br><sup>#</sup> Irritability<br><br><sup>#</sup> Delayed Puberty<br><br><sup>#</sup> Pustulosis<br><br><sup>#</sup> Contractures: UL/LL<br><br><sup>#</sup> Maxillary bone hyperplasia<br><br><sup>#</sup> Prominent forehead<br><br><sup>#</sup> Splenectomy | c.540_541del;<br><br>p.Cys181*                             |
| <b>Al – Mosawi et al. (18)</b><br><br><b>n = 1</b> | Arabic                  | + | F/Neonatal/ UC | Recurrent fever<br><br>CRMO<br><br>Microcytic anemia<br><br>Reticulocytosis<br><br>Mild neutropenia<br><br>Cholestatic jaundice                                                                                                                                                                                                                                                                | Homozygous for<br><br>c.2327+1G>C;<br><br>p.Arg776Serfs*66 |

|                                                             |                          |    |             |                                                                                                                                |                                                               |
|-------------------------------------------------------------|--------------------------|----|-------------|--------------------------------------------------------------------------------------------------------------------------------|---------------------------------------------------------------|
|                                                             |                          |    |             | Hepatosplenomegaly                                                                                                             |                                                               |
| <b>Herlin et al.</b><br><br><b>(14)</b><br><br><b>n = 2</b> | Turkish<br><br>Sibship 4 | +  | M/6m/29m    | CRMO<br><br>Microcytic anemia<br><br>Elevated IL-1 $\beta$ , IL-6, IL-8<br><br>TNF- $\alpha$<br><br>\$ Recurrent fever         | Homozygous for<br><br>c.1312_1313del;<br><br>p.Ser439Trpfs*15 |
|                                                             |                          |    | \$ M/3m/13m |                                                                                                                                |                                                               |
| <b>Rao et al. (19)</b><br><br><b>n = 2</b>                  | Indian<br><br>Cousins    |    | M/2y/15y    | Failure to thrive<br><br>Delayed puberty<br><br>CRMO<br><br>Microcytic anemia<br><br>Mild leucopenia<br><br>Hepatosplenomegaly | Homozygous for<br><br>c.2241_2243delinsGG;<br><br>p.Tyr747*   |
|                                                             |                          |    | M/8y/13y    | Failure to thrive<br><br>CRMO<br><br>Mild Microcytic anemia                                                                    |                                                               |
| <b>Fernandes et al. (20)</b><br><br><b>n =1</b>             | NA                       | NA | M/6y/12y    | CRMO<br><br>Alpha – thalassemia minor                                                                                          | Homozygous for<br><br>c.2327 + 1G>C;<br><br>p.Arg776Serfs*66  |



|                                                     |                         |    |                      |                                                                                                    |                                                            |
|-----------------------------------------------------|-------------------------|----|----------------------|----------------------------------------------------------------------------------------------------|------------------------------------------------------------|
| <b>Moussa et al.</b><br><b>(21)</b><br><b>n =2</b>  | Arabic<br><br>Sibship 5 | +  | @ M/6m/5y            | CRMO                                                                                               | Homozygous for<br><br>c.2201C>T;<br><br>p.Ser734Leu        |
|                                                     |                         |    | F/4y/14y             | Microcytic anemia (@mild)                                                                          |                                                            |
| <b>Al – Mosawi et al. (22)</b><br><b>n = 2</b>      | Arabic<br><br>Sibship 6 | +  | ⊥ M/11m/UC           | CRMO                                                                                               | Homozygous for<br><br>c.2327+1G>C;<br><br>p.Arg776Serfs*66 |
|                                                     |                         |    | F/15m/UC             | Microcytic anemia<br><br>⊥Recurrent fever<br><br>⊥Neutropenia                                      |                                                            |
| <b>Karacan et al.</b><br><b>(23)</b><br><b>n =1</b> | Turkish                 | NA | M/NA/9y              | NA                                                                                                 | Homozygous for<br><br>c.1456del;<br><br>p.Glu486Lysfs*20   |
| <b>Roy et al. (11)</b><br><b>n = 6</b>              | Pakistani<br><br>Family | +  | F/Infancy/NA         | Irritability<br><br>Failure to thrive<br><br>Recurrent fever<br><br>°CRMO<br><br>Microcytic anemia | Homozygous for<br><br>c.2207 G>A;<br><br>p.Arg736His       |
|                                                     |                         |    | M/NA/NA (2 siblings) | CRMO                                                                                               |                                                            |
|                                                     |                         |    | Mother/ NA/NA        | Microcytic anemia                                                                                  |                                                            |

|                                              |          |    | F (sib)/NA/NA | Mild anemia<br><br>Limb pain                                       |                                                                                                                                           |
|----------------------------------------------|----------|----|---------------|--------------------------------------------------------------------|-------------------------------------------------------------------------------------------------------------------------------------------|
|                                              |          |    | Father/NA/NA  | Non-specific knee pain                                             |                                                                                                                                           |
| <b>Liu et al. (13)</b><br><br><b>n =1</b>    | Chinese  | No | M/6m/UC       | Recurrent fever<br><br>Microcytic anemia<br><br>Severe neutropenia | Compound heterozygous<br><br>for<br><br>c.2327 + 1G > C;<br><br>p.Arg776Serfs*66<br><br>and<br><br>c.1691_1694del;<br><br>p.Arg564Lysfs*3 |
| <b>Bhuyan et al. (9)</b><br><br><b>n = 1</b> | American |    | F/12m/4y      | Dyserythropoietic anemia<br><br>Bone pains                         | Compound heterozygous<br><br>c.1550G>A;<br><br>p.Arg517His and<br><br>17.8kb deletion of exons<br><br>7 to 18                             |

In addition to these, twenty-five patients with pathogenic or likely pathogenic variants in *LPIN2*, six other patients (12) were reported to have a homozygous mutation in *LPIN2*, but these variants were not described. <sup>a</sup>=Skin lesion resembling Sweet syndrome; <sup>b</sup>= high grade; c = extensive involvement; <sup>d</sup> = transfusion dependent; <sup>e</sup> = nocturnal pain

**Abbreviations:** M=Male; F =Female; 3<sup>0</sup>= 3<sup>rd</sup> degree; NA= Not Available; w=weeks; m=months; y=years; CRMO =Chronic Recurrent Multifocal Osteomyelitis; UC = Unclear; UL = Upper Limb; LL = Lower Limb.
